# Supplementary material
Source: PubMed Central journal article supplement (PMC4439132)

Mouse NTPDase1 positive control

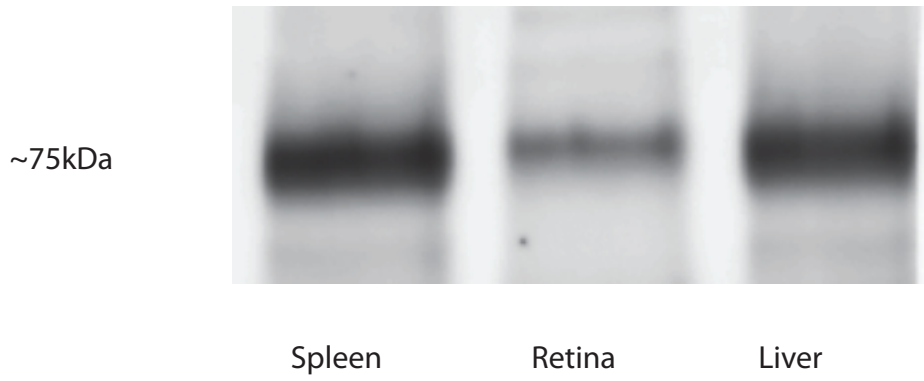

Merged picture shows protein size

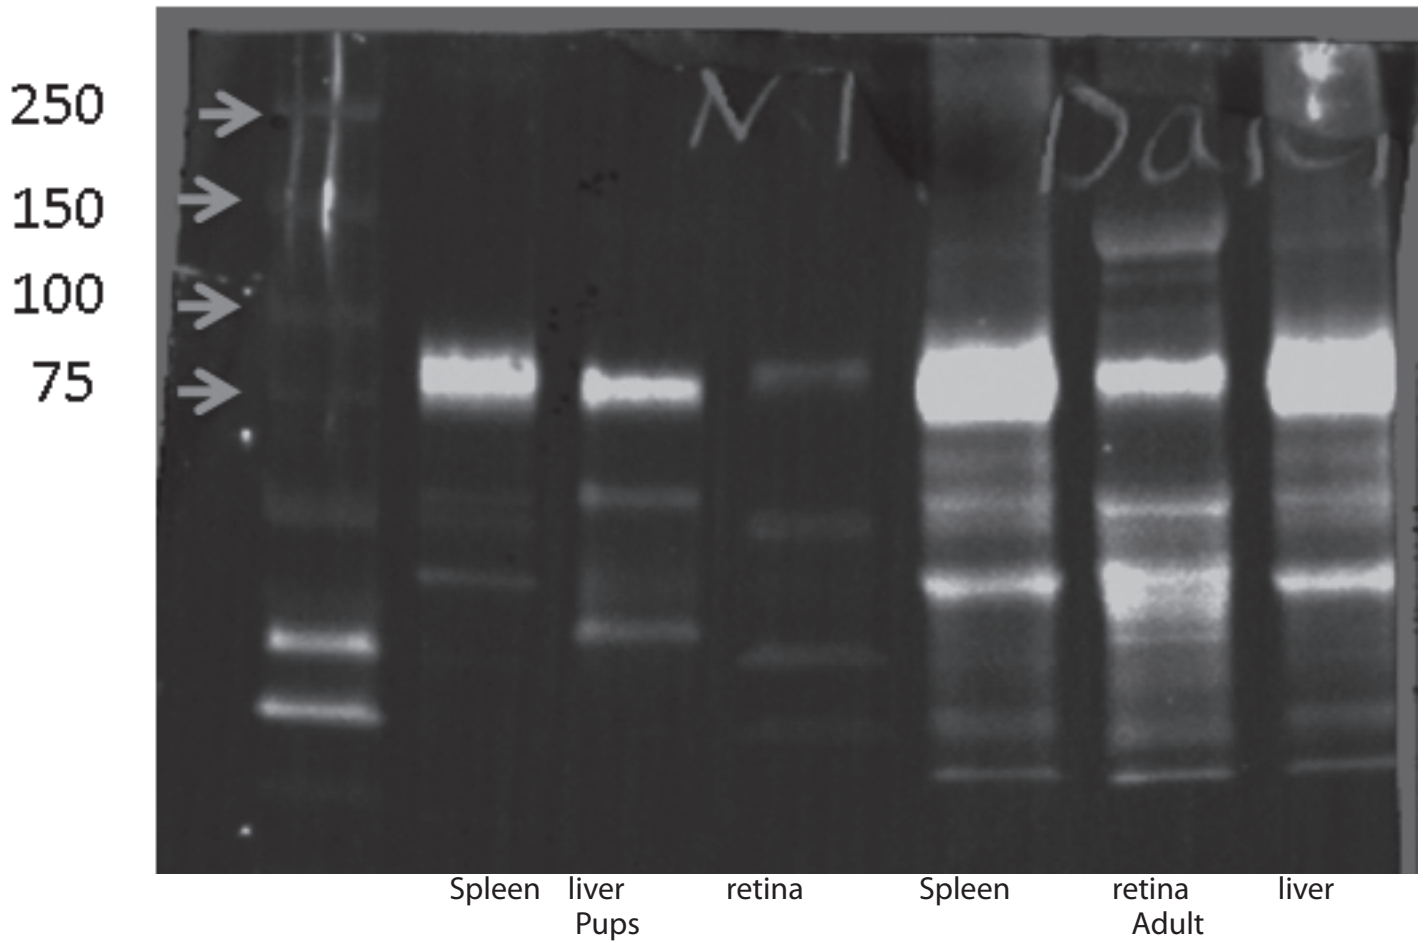

Supplement: i1552-5783-56-5-3075-s01.pdf [file i1552-5783-56-5-3075-s01.pdf]

Rat NTPDase1

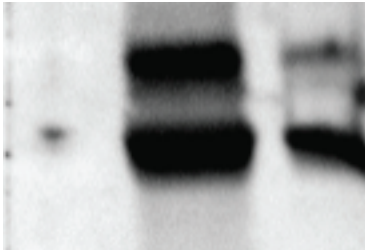

Lung      Retina  
Rat

Merged image shows molecular size

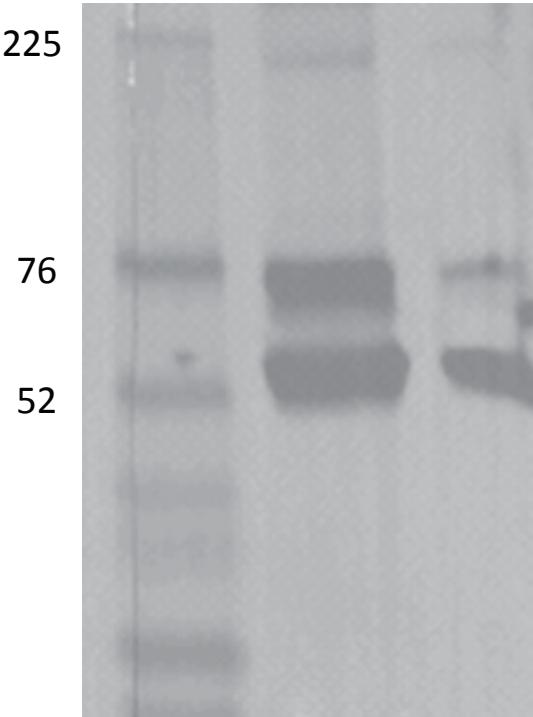

Lung   retina

Supplement: i1552-5783-56-5-3075-s02.pdf [file i1552-5783-56-5-3075-s02.pdf]
